# Supplementary material for: HNRNPK inhibits gastric cancer cell proliferation through p53/p21/CCND1 pathway
Source: PubMed Central journal article supplement (PMC5732733; doi:10.18632/oncotarget.21873), 2017-10-17
Supplement: oncotarget-08-103364-s001.pdf [file oncotarget-08-103364-s001.pdf]

# HNRNPK inhibits gastric cancer cell proliferation through p53/p21/CCND1 pathway

## SUPPLEMENTARY MATERIALS

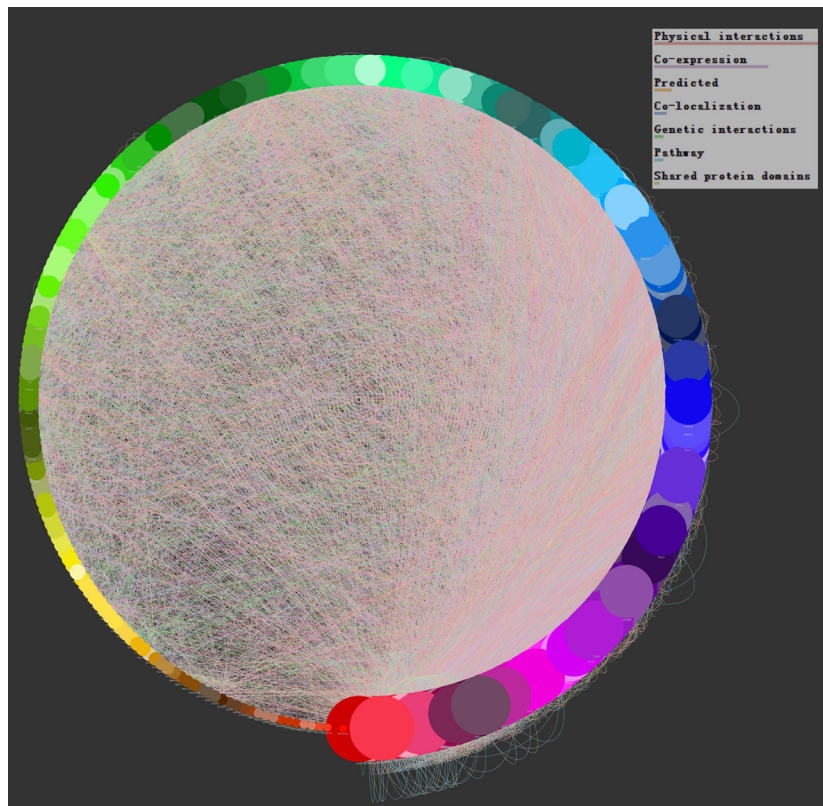

Supplementary Figure 1: Protein-protein interaction network of HNRNPK.

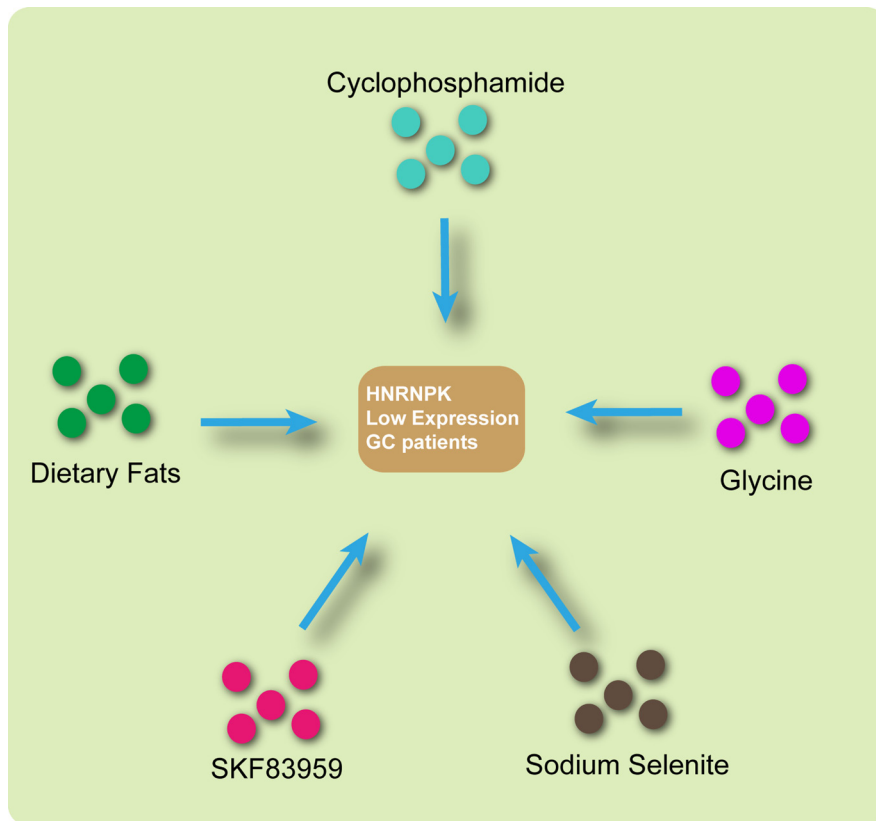

**Supplementary Figure 2: Chemicals that can upregulate HNRNPK.**

**Supplementary Table 1: Differentially expressed genes between top 100 samples and bottom 100 samples of TCGA gastric cancer expression data which ranked by HNRNPK expression levels.** See Supplementary\_Table\_1

**Supplementary Table 2: Gene annotation analysis of differentially expressed genes by GeneMANIA plugin in cytoscape environment.** See Supplementary\_Table\_2

**Supplementary Table 3: Physical interaction proteins with HNRNPK.** See Supplementary\_Table\_3
